# Supplementary material for: Sex differences in the relationship between depression and cardiovascular disease risk: a nationwide study in Korea
Source: PubMed Central journal article supplement — Osong Public Health Res Perspect. 2021 Apr 29;12(2):105–14. doi: 10.24171/j.phrp.2021.12.2.08 (PMC8102882; doi:10.24171/j.phrp.2021.12.2.08), 2021-04-29
Supplement: j-phrp-2021-12-2-08-suppl1.pdf [file j-phrp-2021-12-2-08-suppl1.pdf]

**Table S1.** The cardiovascular risk functions

| Model         | Male                                                                                                                                                                                                                                                                                                                                                                  | Female                                                                                                                                                                                                                                                                                                                                                                |
|---------------|-----------------------------------------------------------------------------------------------------------------------------------------------------------------------------------------------------------------------------------------------------------------------------------------------------------------------------------------------------------------------|-----------------------------------------------------------------------------------------------------------------------------------------------------------------------------------------------------------------------------------------------------------------------------------------------------------------------------------------------------------------------|
| Primary model | < If, not treated for hypertension ><br>$\Sigma BX = \{(\log \text{ of age} * 3.06117)$<br>$+ (\log \text{ of total cholesterol} * 1.12370)$<br>$- (\log \text{ of HDL cholesterol} * 0.93263)$<br>$+ (\log \text{ of SBP} * 1.93303)$<br>$+ (\text{smoking} * 0.65451)$<br>$+ (\text{diabetes} * 0.57367)\}$                                                         | < If, treated for hypertension ><br>$\Sigma BX = \{(\log \text{ of age} * 2.32888)$<br>$+ (\log \text{ of total cholesterol} * 1.20904)$<br>$- (\log \text{ of HDL cholesterol} * 0.70833)$<br>$+ (\log \text{ of SBP} * 2.76157)$<br>$+ (\text{smoking} * 0.52873)$<br>$+ (\text{diabetes} * 0.69154)\}$                                                             |
|               | < If, treated for hypertension ><br>$\Sigma BX = \{(\log \text{ of age} * 3.06117)$<br>$+ (\log \text{ of Total cholesterol} * 1.12370)$<br>$- (\log \text{ of HDL cholesterol} * 0.93263)$<br>$+ (\log \text{ of SBP} * 1.99881)$<br>$+ (\text{smoking} * 0.65451)$<br>$+ (\text{diabetes} * 0.57367)\}$<br>10-year risk = $1 - 0.88936^{\exp(\Sigma BX - 23.9802)}$ | < If, treated for hypertension ><br>$\Sigma BX = \{(\log \text{ of age} * 2.32888)$<br>$+ (\log \text{ of Total cholesterol} * 1.20904)$<br>$- (\log \text{ of HDL cholesterol} * 0.70833)$<br>$+ (\log \text{ of SBP} * 2.82263)$<br>$+ (\text{smoking} * 0.52873)$<br>$+ (\text{diabetes} * 0.69154)\}$<br>10-year risk = $1 - 0.95012^{\exp(\Sigma BX - 26.1931)}$ |
| SOBNL model   | < If, not treated for hypertension ><br>$\Sigma BX = \{(\log \text{ of age} * 3.11296)$<br>$+ (\log \text{ of body mass index} * 0.79277)$<br>$+ (\log \text{ of SBP} * 1.85508)$<br>$+ (\text{smoking} * 0.70953)$<br>$+ (\text{diabetes} * 0.53160)\}$                                                                                                              | < If, not treated for hypertension ><br>$\Sigma BX = \{(\log \text{ of age} * 2.72107)$<br>$+ (\log \text{ of body mass index} * 0.51125)$<br>$+ (\log \text{ of SBP} * 2.81291)$<br>$+ (\text{smoking} * 0.61868)$<br>$+ (\text{diabetes} * 0.77763)\}$                                                                                                              |
|               | < If, treated for hypertension ><br>$\Sigma BX = \{(\log \text{ of age} * 3.11296)$<br>$+ (\log \text{ of body mass index} * 0.79277)$<br>$+ (\log \text{ of SBP} * 1.92672)$<br>$+ (\text{smoking} * 0.70953)$<br>$+ (\text{diabetes} * 0.53160)\}$<br>10-year risk = $1 - 0.88431^{\exp(\Sigma BX - 23.9388)}$                                                      | < If, treated for hypertension ><br>$\Sigma BX = \{(\log \text{ of age} * 2.72107)$<br>$+ (\log \text{ of body mass index} * 0.51125)$<br>$+ (\log \text{ of SBP} * 2.88267)$<br>$+ (\text{smoking} * 0.61868)$<br>$+ (\text{diabetes} * 0.77763)\}$<br>10-year risk = $1 - 0.94833^{\exp(\Sigma BX - 26.0145)}$                                                      |

These formulations are available at: <https://framinghamheartstudy.org/fhs-risk-functions/cardiovascular-disease-10-year-risk/>.  
HDL, high-density lipoprotein; SBP, systolic blood pressure; SOBNL, simple office-based non-laboratory model.
