# Supplementary material for: Sex differences in the relationship between depression and cardiovascular disease risk: a nationwide study in Korea
Source: PubMed Central journal article supplement — Osong Public Health Res Perspect. 2021 Apr 29;12(2):105–14. doi: 10.24171/j.phrp.2021.12.2.08 (PMC8102882; doi:10.24171/j.phrp.2021.12.2.08), 2021-04-29
Supplement: j-phrp-2021-12-2-08-suppl2.pdf [file j-phrp-2021-12-2-08-suppl2.pdf]

**Table S2.** The distribution of cardiovascular disease risk calculated by simple office-based non-laboratory model

| Characteristic                       | Male (n = 10,458) | Female (n = 14,975) | p       |
|--------------------------------------|-------------------|---------------------|---------|
| Age (y)                              | 47.11 ± 0.15      | 47.22 ± 0.13        | 0.429   |
| Body mass index (kg/m <sup>2</sup> ) | 24.44 ± 0.04      | 23.38 ± 0.04        | < 0.001 |
| SBP (mmHg)                           | 120.14 ± 0.18     | 113.88 ± 0.17       | < 0.001 |
| Hypertension treatment               | 2,000 (15.0)      | 2,320 (12.6)        | < 0.001 |
| Diabetes                             | 936 (6.9)         | 846 (4.7)           | < 0.001 |
| Current smoking                      | 4,185 (43.1)      | 801 (6.2)           | < 0.001 |
| CVD risk (%)                         |                   |                     |         |
| < 5                                  | 2,485 (28.9)      | 9,629 (70.2)        | < 0.001 |
| 5–9                                  | 2,393 (26.4)      | 2,688 (16.5)        |         |
| 10–19                                | 2,523 (24.0)      | 1,894 (9.7)         |         |
| ≥ 20                                 | 3,057 (20.7)      | 764 (3.5)           |         |
| Mean ± SE (%)                        | 13.11 ± 0.14      | 4.93 ± 0.06         | < 0.001 |

Data are presented as mean ± SE or n (%). Data are unweighted number and weighted proportions. SBP, systolic blood pressure; CVD, cardiovascular disease; SE, standard error.
