# Supplementary material for: Sex differences in the relationship between depression and cardiovascular disease risk: a nationwide study in Korea
Source: PubMed Central journal article supplement — Osong Public Health Res Perspect. 2021 Apr 29;12(2):105–14. doi: 10.24171/j.phrp.2021.12.2.08 (PMC8102882; doi:10.24171/j.phrp.2021.12.2.08), 2021-04-29
Supplement: j-phrp-2021-12-2-08-suppl3.pdf [file j-phrp-2021-12-2-08-suppl3.pdf]

**Table S3.** Multiple logistic regression results on the association between depression and cardiovascular disease risk by the simple office-based non-laboratory model

| Model <sup>a)</sup> | Male (n = 10,458) |       | Female (n = 14,975) |         |
|---------------------|-------------------|-------|---------------------|---------|
|                     | OR (95% CI)       | p     | OR (95% CI)         | p       |
| 0                   | 1.77 (1.15–2.71)  | 0.009 | 2.32 (1.88–2.86)    | < 0.001 |
| 1                   | 1.45 (0.74–2.82)  | 0.280 | 1.69 (1.11–2.56)    | 0.014   |
| 2                   | 1.19 (0.60–2.37)  | 0.625 | 1.56 (1.02–2.38)    | 0.039   |
| 3                   | 2.09 (1.30–3.37)  | 0.002 | 1.79 (1.35–2.38)    | < 0.001 |
| 4                   | 1.33 (0.56–3.17)  | 0.518 | 1.15 (0.75–1.78)    | 0.527   |

OR, odds ratio; CI, confidence interval.

<sup>a)</sup>Each model was adjusted as follows: 0, no adjustment; 1, by age (continuous); 2, by age (continuous), income, occupation; 3, by drinking, smoking, physical activity, stress, comorbidity; 4, by all factors.
