# Supplementary material for: Sex differences in the relationship between depression and cardiovascular disease risk: a nationwide study in Korea
Source: PubMed Central journal article supplement — Osong Public Health Res Perspect. 2021 Apr 29;12(2):105–14. doi: 10.24171/j.phrp.2021.12.2.08 (PMC8102882; doi:10.24171/j.phrp.2021.12.2.08), 2021-04-29
Supplement: j-phrp-2021-12-2-08-suppl4.pdf [file j-phrp-2021-12-2-08-suppl4.pdf]

**Table S4.** Additional analysis results on the association between depression and cardiovascular disease risk after stratifying according to categories

| Characteristic    | Male (n = 10,458) |       | Female (n = 14,975) |         |
|-------------------|-------------------|-------|---------------------|---------|
|                   | OR (95% CI)       | p     | OR (95% CI)         | p       |
| Alcohol intake    |                   |       |                     |         |
| < 1 time/mo       | 1.33 (0.64–2.78)  | 0.445 | 2.38 (1.77–3.19)    | < 0.001 |
| 1–4 times/mo      | 1.17 (0.51–2.67)  | 0.711 | 1.99 (1.32–2.99)    | 0.001   |
| ≥ 2 times/wk      | 2.15 (1.05–4.39)  | 0.037 | 1.24 (0.66–2.37)    | 0.502   |
| Current smoking   |                   |       |                     |         |
| No                | 1.25 (0.70–2.22)  | 0.447 | 2.14 (1.70–2.69)    | < 0.001 |
| Yes               | 2.11 (1.07–4.16)  | 0.031 | 1.42 (0.75–2.71)    | 0.284   |
| Physical activity |                   |       |                     |         |
| No                | 1.52 (0.90–2.56)  | 0.115 | 2.14 (1.68–2.74)    | < 0.001 |
| Yes               | 1.74 (0.77–3.92)  | 0.183 | 2.03 (1.28–3.23)    | 0.003   |
| Perceived stress  |                   |       |                     |         |
| Much              | 2.15 (1.18–3.91)  | 0.012 | 2.02 (1.53–2.67)    | < 0.001 |
| Little            | 1.94 (0.99–3.80)  | 0.053 | 2.74 (1.94–3.87)    | < 0.001 |
| Comorbidities     |                   |       |                     |         |
| No                | 1.49 (0.76–2.93)  | 0.246 | 1.80 (1.33–2.45)    | < 0.001 |
| Yes               | 1.36 (0.68–2.71)  | 0.383 | 1.09 (0.73–1.63)    | 0.669   |

OR, odds ratio; CI, confidence interval.
