# Supplementary material for: Sex differences in the relationship between depression and cardiovascular disease risk: a nationwide study in Korea
Source: PubMed Central journal article supplement — Osong Public Health Res Perspect. 2021 Apr 29;12(2):105–14. doi: 10.24171/j.phrp.2021.12.2.08 (PMC8102882; doi:10.24171/j.phrp.2021.12.2.08), 2021-04-29
Supplement: j-phrp-2021-12-2-08-suppl5.pdf [file j-phrp-2021-12-2-08-suppl5.pdf]

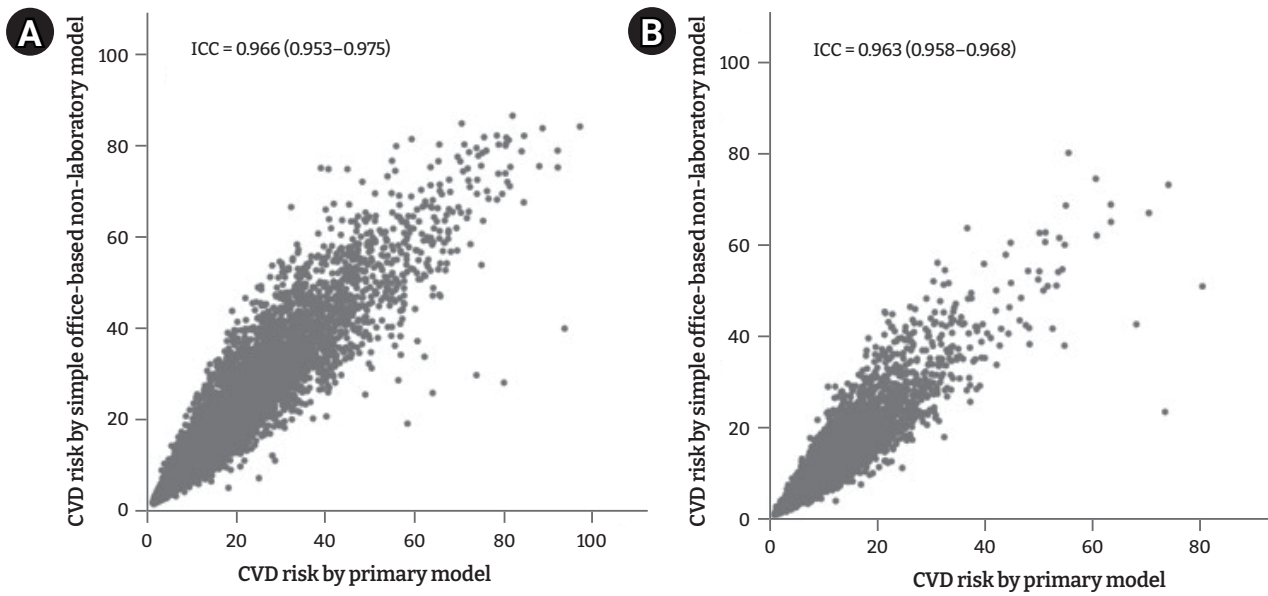

**Figure S1.** Agreement of cardiovascular risk calculated by primary model and simple office-based non-laboratory model according to sex (A, male; B, female). ICC, intra-class correlation coefficient; CVD, cardiovascular disease.
